# Supplementary material
Source: PubMed Central journal article supplement (PMC7341919)

**ELECTRONIC SUPPLEMENTARY MATERIAL**

**Table S1.** Flowchart for the publication selection process based on PRISMA (Preferred Reporting Items for Meta-Analyses) guidelines. Diagram showing the selection process followed to include publications in the meta-analysis. Chart format is based on [1]. Search terms for Web of Science search shown.

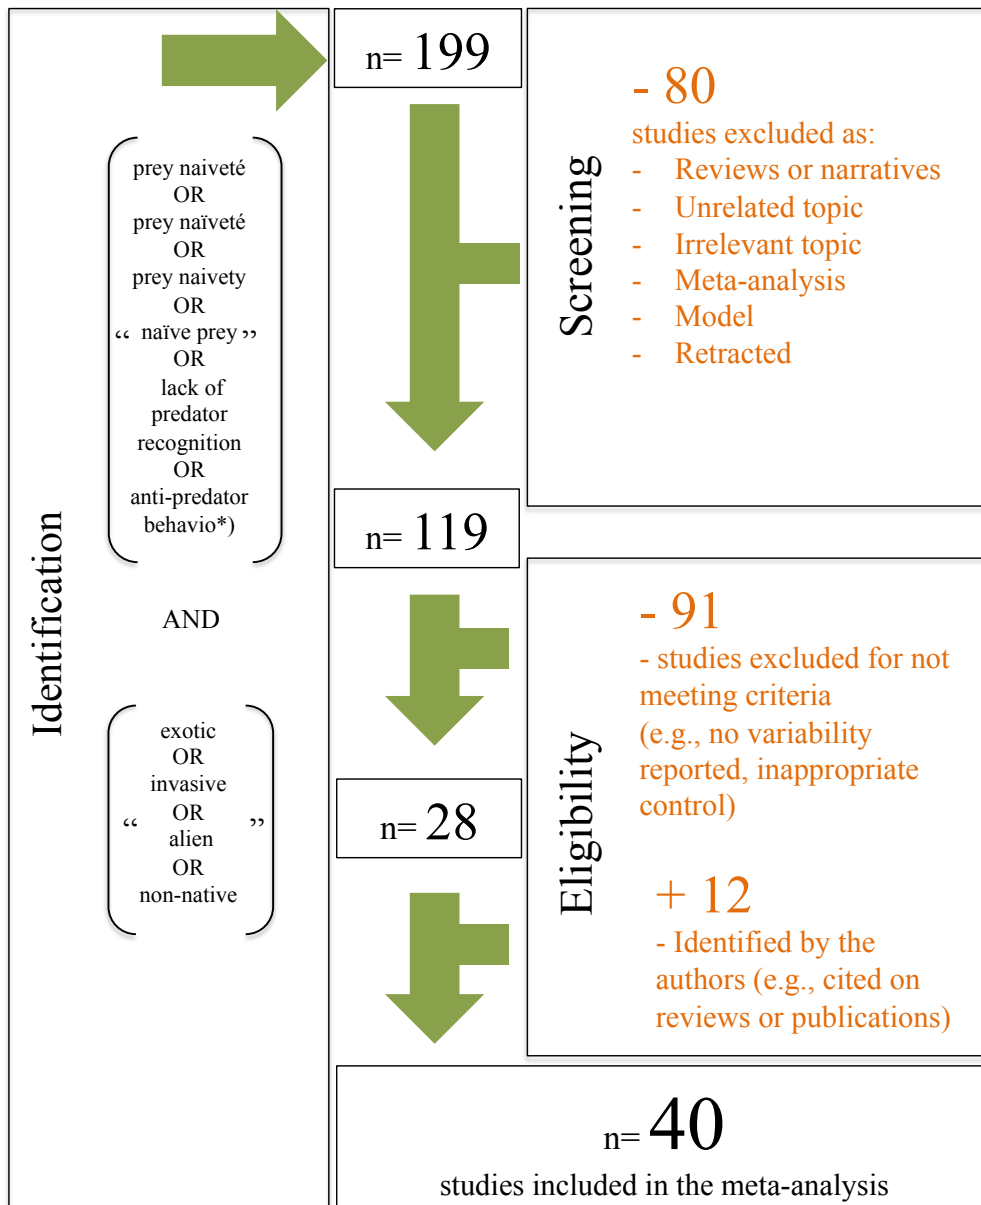

**Table S2.** Information of the 40 studies included in the meta-analysis to investigate determinants of prey naiveté. In parentheses, number of experiments (first) and number of observations (second) from the study that were included in the meta-analysis

| Citation                                | Exotic predator                                                                    | Native predator                                                                                                                             | Native prey                                                                                                                                                                        | System type | Location          |
|-----------------------------------------|------------------------------------------------------------------------------------|---------------------------------------------------------------------------------------------------------------------------------------------|------------------------------------------------------------------------------------------------------------------------------------------------------------------------------------|-------------|-------------------|
| Alvarez <i>et al.</i> 2014 (1,4)        | <i>Psetta maxima</i> , <i>Lithobates iberica</i>                                   | <i>Salmo trutta</i> , <i>Cyprinus carpio</i>                                                                                                | <i>Baetis rhodani</i>                                                                                                                                                              | Freshwater  | Spain             |
| Anson & Dickman 2013 (2,2)              | <i>Vulpes vulpes</i>                                                               | <i>Varanus varius</i>                                                                                                                       | <i>Pseudocheirus peregrinus</i>                                                                                                                                                    | Terrestrial | Australia         |
| Anton 2013 (2,5)                        | <i>Pterois volitans</i>                                                            | <i>Epinephelus striatus</i> , <i>Ocyurus chrysurus</i> , <i>Lutjanus apodus</i> , <i>Epinephelus guttatus</i>                               | <i>Haemulon plumieri</i>                                                                                                                                                           | Marine      | Bahamas           |
| Barrio <i>et al.</i> 2010 (1,6)*        | <i>Dasyurus maculatus</i>                                                          | <i>Felis catus</i> , <i>Mustela furo</i> , <i>Vulpes vulpes</i>                                                                             | <i>Oryctolagus cuniculus</i>                                                                                                                                                       | Terrestrial | Australia         |
| Black <i>et al.</i> 2014 (2,3)          | <i>Pterois volitans</i>                                                            | <i>Synodus intermedius</i>                                                                                                                  | <i>Stegastes leucostictus</i>                                                                                                                                                      | Marine      | Jamaica           |
| Blake & Gabor 2016 (1,2)                | <i>Fundulus grandis</i>                                                            | <i>Lepomis cyanellus</i>                                                                                                                    | <i>Gambusia affinis</i>                                                                                                                                                            | Freshwater  | USA               |
| Blake <i>et al.</i> 2015 (1,2)          | <i>Fundulus grandis</i>                                                            | <i>Lepomis cyanellus</i>                                                                                                                    | <i>Gambusia geiseri</i>                                                                                                                                                            | Freshwater  | USA               |
| Bourdeau <i>et al.</i> 2013 (1,7)       | <i>Bythotrephes longimanu</i> , <i>Cercopagis pengois</i>                          | <i>Mysis diluviana</i> , <i>Leptodora kindtii</i> , <i>Polyphemus pediculus</i> , <i>Perca flavescens</i>                                   | <i>Daphnia mendotae</i>                                                                                                                                                            | Freshwater  | USA               |
| Brown <i>et al.</i> 2013 (1,3)          | <i>Oreochromis niloticus</i>                                                       | <i>Crenicichla macrophthalmia</i>                                                                                                           | <i>Poecilia reticulata</i>                                                                                                                                                         | Freshwater  | Trinidad y Tobago |
| Burraco & Gomez-Mestre 2016 (1,2)       | <i>Procambarus clarkii</i>                                                         | <i>Dytiscus circumflexus</i>                                                                                                                | <i>Pelobates cultripes</i>                                                                                                                                                         | Freshwater  | Spain             |
| Carthey & Banks 2016 (2,5)              | <i>Canis lupus familiaris</i> , <i>Felis catus</i> , <i>Vulpes Vulpes</i>          | <i>Dasyurus maculatus</i>                                                                                                                   | <i>Rattus fuscipes</i>                                                                                                                                                             | Terrestrial | Australia         |
| Carthey & Banks 2018 (1,2)              | <i>Dasyurus maculatus</i>                                                          | <i>Vulpes vulpes</i> , <i>Felis catus</i>                                                                                                   | <i>Rattus rattus</i>                                                                                                                                                               | Terrestrial | Australia         |
| Coverdale <i>et al.</i> 2013 (1,2)      | <i>Carcinus maenas</i>                                                             | <i>Cancer irroratus</i> , <i>Callinectes sapidus</i>                                                                                        | <i>Sesarma reticulatum</i>                                                                                                                                                         | Marine      | USA               |
| Davis 2018 (1,3)                        | <i>Pterois volitans</i>                                                            | <i>Cephalopholis cruentata</i>                                                                                                              | <i>Stegastes partitus</i>                                                                                                                                                          | Marine      | Bahamas           |
| Davis <i>et al.</i> 2012 (1,3)          | <i>Lepomis auritus</i> , <i>Lepomis gibbosus</i> , <i>Herichthys cyanoguttatus</i> | <i>Lepomis cyanellus</i>                                                                                                                    | <i>Eurycea nana</i>                                                                                                                                                                | Freshwater  | USA               |
| Dunlop & Rehage 2011 (3,12)             | <i>Hemichromis letourneuxi</i>                                                     | <i>Lepomis gulosus</i>                                                                                                                      | <i>Gambusia holbrooki</i> , <i>Jordanella floridae</i> , <i>Palaemonetes paludosus</i>                                                                                             | Freshwater  | USA               |
| Fan & Lin 2017 (2,12)                   | <i>Gambusia affinis</i>                                                            | <i>Pantala flavescens</i>                                                                                                                   | <i>Bufo gararizans</i> , <i>Duttaphrynus melanostictus</i> , <i>Rana zhenhaiensis</i> , <i>Fejervaya multistriata</i> , <i>Microhyala ornate</i> , <i>Hoplobatrachus chinensis</i> | Freshwater  | China             |
| Fey <i>et al.</i> 2010 (2,2)            | <i>Mustela vison</i>                                                               | <i>Mustela nivalis</i>                                                                                                                      | <i>Microtus agrestis</i>                                                                                                                                                           | Terrestrial | Finland           |
| Freeman <i>et al.</i> 2013 (3,3)        | <i>Carcinus maenas</i>                                                             | <i>Paragrapsus gaimardii</i>                                                                                                                | <i>Haustrum vinosum</i>                                                                                                                                                            | Marine      | Australia         |
| Garvey <i>et al.</i> 2016 (1,8)*        | <i>Lycaon pictus</i>                                                               | <i>Mustela furo</i> , <i>Felis catus</i>                                                                                                    | <i>Mustela erminea</i>                                                                                                                                                             | Terrestrial | New Zealand       |
| Geray <i>et al.</i> 2015 (2,5)          | <i>Oncorhynchus mykiss</i>                                                         | <i>Hatcheria macraei</i>                                                                                                                    | <i>Meridialis chiloensis</i> , <i>Antarctoperla michaelsoni</i> , <i>Smicridea annulicornis</i>                                                                                    | Freshwater  | Argentina         |
| Gherardi <i>et al.</i> 2011 (2,4)*      | <i>Cyprinus carpio</i> , <i>Tilapia zillii</i> , <i>Squalius cephalus</i> ,        | <i>Micropterus salmoides</i>                                                                                                                | <i>Procambarus clarkii</i>                                                                                                                                                         | Freshwater  | Italy/Kenya       |
| Gomez-Mestre & Diaz-Paniagua 2011 (1,1) | <i>Procambarus clarkii</i>                                                         | <i>Anax imperator</i>                                                                                                                       | <i>Pelophylax perezi</i>                                                                                                                                                           | Freshwater  | Spain             |
| Haddaway <i>et al.</i> 2014 (3,6)       | <i>Pacifastacus leniusculus</i>                                                    | <i>Gasterosteus aculeatus</i> , <i>Austroptamobius pallipes</i>                                                                             | <i>Gammarus pulex</i> , <i>Potamopyrgus jenkinsi</i> ,                                                                                                                             | Freshwater  | United Kingdom    |
| Hutson <i>et al.</i> 2005 (3,3)         | <i>Asterias amurensis</i>                                                          | <i>Coscinasterias muricata</i>                                                                                                              | <i>Chlamys asperrima</i> , <i>Pecten fumatus</i>                                                                                                                                   | Marine      | Australia         |
| Jedrzejewski <i>et al.</i> 1993 (1,18)  | <i>Nyctereutes procyonoides</i>                                                    | <i>Mustela nivalis</i> , <i>Mustela erminea</i> , <i>Mustela putorius</i> , <i>Martes foina</i> , <i>Vulpes vulpes</i> , <i>Strix aluco</i> | <i>Clethrionomys glareolus</i>                                                                                                                                                     | Terrestrial | Poland            |
| Jermacz <i>et al.</i> 2017 (1,2)        | <i>Pygocentrus nattereri</i>                                                       | <i>Babka gymnotrachelus</i>                                                                                                                 | <i>Pontogammarus robustoides</i> , <i>Dikerogammarus villosus</i>                                                                                                                  | Freshwater  | Poland            |
| Jones <i>et al.</i> 2004 (2,8)          | <i>Vulpes vulpes</i> , <i>Felis catus</i>                                          | <i>Tytonovaeahollandiae castanops</i> , <i>Sarcophilus laniarius</i>                                                                        | <i>Dasyurus viverrinus</i>                                                                                                                                                         | Terrestrial | Tasmania          |
| Kovalenco <i>et al.</i> 2010 (1,2)      | <i>Cichla kelberi</i>                                                              | <i>Hoplias malabaricus</i>                                                                                                                  | <i>Hemigrammus marginatus</i>                                                                                                                                                      | Freshwater  | USA               |
| Kuehne & Olden 2012 (1,4)               | <i>Micropterus dolomieu</i>                                                        | <i>Ptychocheilus oregonensis</i>                                                                                                            | <i>Oncorhynchus tshawytscha</i>                                                                                                                                                    | Freshwater  | Brazil            |

|                                       |                                                              |                                                                                                                                                                     |                                                                                                                                                                                                                                                   |             |              |
|---------------------------------------|--------------------------------------------------------------|---------------------------------------------------------------------------------------------------------------------------------------------------------------------|---------------------------------------------------------------------------------------------------------------------------------------------------------------------------------------------------------------------------------------------------|-------------|--------------|
| Marsh-Hunkin <i>et al.</i> 2013 (2,6) | <i>Pterois volitans</i>                                      | <i>Epinephelus striatus</i>                                                                                                                                         | <i>Coryphopterus glaucofraenum</i> ,<br><i>Gnatholepis thompsoni</i>                                                                                                                                                                              | Marine      | Bahamas      |
| Mella <i>et al.</i> 2015 (1,4)*       | <i>Dasyurus maculatus</i> , <i>Aspidites malanocephalus</i>  | <i>Vulpes vulpes</i> , <i>Felis catus</i>                                                                                                                           | <i>Oryctolagus cuniculus</i>                                                                                                                                                                                                                      | Terrestrial | Australia    |
| Murray <i>et al.</i> 2004 (1,4)       | <i>Rana catesbeiana</i>                                      | <i>Thamnophis elegans</i>                                                                                                                                           | <i>Rana luteiventris</i> , <i>Ambystoma macrodactylum</i> , <i>Hyla regilla</i> ,<br><i>Tarichia granulosa</i>                                                                                                                                    | Freshwater  | USA          |
| Nunes <i>et al.</i> 2013 (1,18)       | <i>Procambarus clarkii</i>                                   | <i>Aeshna</i> sp.                                                                                                                                                   | <i>Alytes cisternasii</i> , <i>Bufo bufo</i> ,<br><i>Discoglossus galganoi</i> , <i>Hyla meridionalis</i> , <i>Hyla arborea</i> ,<br><i>Pelobates cultripes</i> ,<br><i>Pelophylax perezii</i> , <i>Pelodytes ibericus</i> , <i>Bufo calamita</i> | Freshwater  | Portugal     |
| Polo-Cavia <i>et al.</i> 2010 (4,16)  | <i>Trachemys script</i> , <i>Graptemys pseudogeographica</i> | <i>Emys orbiculari</i> , <i>Mauremys leprosas</i>                                                                                                                   | <i>Pelophylax perezii</i> , <i>Pelobates cultripes</i> , <i>Bufo calamita</i> , <i>Hyla arborea</i>                                                                                                                                               | Freshwater  | Spain        |
| Pujol-Buxo <i>et al.</i> 2013 (1,2)   | <i>Procambarus clarkii</i>                                   | <i>Anax</i> sp.                                                                                                                                                     | <i>Pelodytes punctatus</i>                                                                                                                                                                                                                        | Freshwater  | Spain        |
| Segev <i>et al.</i> 2017 (1,2)        | <i>Gambusia affinis</i>                                      | <i>Barbus paludinosus</i> ,<br><i>Pseudocrenilabrus philander</i>                                                                                                   | <i>Culex</i> spp                                                                                                                                                                                                                                  | Freshwater  | South Africa |
| Superkar & Gramapurohit 2018 (1,5)    | <i>Oreochromis mossambicus</i>                               | <i>Bradinopyga geminata</i> ,<br><i>Clarias batrachus</i> ,<br><i>Hoplobatrachus tigerinus</i> ,<br><i>Hoplobatrachus crassus</i> ,<br><i>Xenochrophis piscator</i> | <i>Euphylectis cyanophlyctis</i>                                                                                                                                                                                                                  | Freshwater  | India        |
| Thawley & Langkilde 2017 (1,4)        | <i>Solenopsis invicta</i>                                    | <i>Dorymyrmex</i> , <i>Pheidole</i>                                                                                                                                 | <i>Sceloporus undulatus</i>                                                                                                                                                                                                                       | Terrestrial | USA          |
| Webster <i>et al.</i> 2018 (2,12)     | <i>Vulpes vulpes</i> , <i>Felis catus</i>                    | <i>Canis lupus dingo</i> , <i>Dasyurus maculatus</i> , <i>Pseudonaja textilis</i>                                                                                   | <i>Christinus marmoratus</i> ,<br><i>Morethia boulengeri</i>                                                                                                                                                                                      | Terrestrial | Australia    |

\* Indicates studies where prey naiveté was tested on exotic prey and native and exotic predators for those species of prey.

**Table S3.** Table with the biogeographic realms used in this meta-analysis

| Biogeographic realm         | System type            | Reference                   |
|-----------------------------|------------------------|-----------------------------|
| Nearctic                    | Terrestrial/Freshwater | Holt <i>et al.</i> 2013     |
| Panamanian                  | Terrestrial/Freshwater | Holt <i>et al.</i> 2013     |
| Neotropical                 | Terrestrial/Freshwater | Holt <i>et al.</i> 2013     |
| Palaearctic                 | Terrestrial/Freshwater | Holt <i>et al.</i> 2013     |
| Saharo-Arabian              | Terrestrial/Freshwater | Holt <i>et al.</i> 2013     |
| Afrotropical                | Terrestrial/Freshwater | Holt <i>et al.</i> 2013     |
| Sino-Japanese               | Terrestrial/Freshwater | Holt <i>et al.</i> 2013     |
| Oriental                    | Terrestrial/Freshwater | Holt <i>et al.</i> 2013     |
| Madagascan                  | Terrestrial/Freshwater | Holt <i>et al.</i> 2013     |
| Australian                  | Terrestrial/Freshwater | Holt <i>et al.</i> 2013     |
| Oceanian                    | Terrestrial/Freshwater | Holt <i>et al.</i> 2013     |
| Arctic                      | Marine                 | Spalding <i>et al.</i> 2007 |
| Temperate Northern Pacific  | Marine                 | Spalding <i>et al.</i> 2007 |
| Temperate Northern Atlantic | Marine                 | Spalding <i>et al.</i> 2007 |
| Eastern Northern Pacific    | Marine                 | Spalding <i>et al.</i> 2007 |
| Tropical Eastern Pacific    | Marine                 | Spalding <i>et al.</i> 2007 |
| Tropical Atlantic           | Marine                 | Spalding <i>et al.</i> 2007 |
| Western Indo-Pacific        | Marine                 | Spalding <i>et al.</i> 2007 |
| Central Indo-Pacific        | Marine                 | Spalding <i>et al.</i> 2007 |
| Temperate South America     | Marine                 | Spalding <i>et al.</i> 2007 |
| Temperate Southern Africa   | Marine                 | Spalding <i>et al.</i> 2007 |
| Temperate Australasia       | Marine                 | Spalding <i>et al.</i> 2007 |
| Southern Ocean              | Marine                 | Spalding <i>et al.</i> 2007 |

**Table S4.** Regression tests for sensitivity analyses associated to Figure 1. Treatments with  $\leq 10$  replicates were not included in the analyses and are indicated with NA.

| Effect size metric                         | Random-effects model (before) |                | Potential publication bias test |         | Outliers | Random-effects model (after) |                |        |
|--------------------------------------------|-------------------------------|----------------|---------------------------------|---------|----------|------------------------------|----------------|--------|
|                                            | n                             | $g \pm 95\%CI$ | z-value                         | p-value |          | n                            | $g \pm 95\%CI$ | Change |
| <b>System type (Fig. 1a)</b>               |                               |                |                                 |         |          |                              |                |        |
| Terrestrial                                | 72                            | -0.11±0.1      | -0.01                           | 0.995   | 0        | 72                           | -0.11±0.1      | No     |
| Freshwater                                 | 117                           | -0.26±0.24     | -0.21                           | 0.249   | 3        | 114                          | -0.26±0.18     | No     |
| Marine                                     | 25                            | -0.83±0.59     | 0.64                            | 0.175   | 2        | 23                           | -0.55±0.37     | No     |
| <b>Insularity (Fig. 1b)</b>                |                               |                |                                 |         |          |                              |                |        |
| Mainland                                   | 54                            | -0.03±0.11     | 0.09                            | 0.552   | 0        | 54                           | -0.03±0.11     | No     |
| Island                                     | 18                            | -0.32±0.19     | -0.28                           | 0.433   | 0        | 18                           | -0.32±0.19     | No     |
| <b>Biogeographic realm (Fig. 1c)</b>       |                               |                |                                 |         |          |                              |                |        |
| Yes                                        | 175                           | -0.39±0.21     | 0.09                            | 0.524   | 4        | 171                          | -0.35±0.16     | No     |
| No                                         | 39                            | -0.12±0.14     | -0.47                           | 0.049   | 0        | 39                           | -0.12±0.14     | No     |
| <b>Taxonomic distinctiveness (Fig. 1d)</b> |                               |                |                                 |         |          |                              |                |        |
| Yes                                        | 24                            | -0.17±0.16     | 0.038                           | 0.85    | 0        | 24                           | -0.17±0.16     | No     |
| No                                         | 190                           | -0.37±0.21     | -0.21                           | 0.833   | 5        | 185                          | -0.30±0.15     | No     |
| <b>Exotic predator (Fig. 1e)</b>           |                               |                |                                 |         |          |                              |                |        |
| Mammal                                     | 66                            | -0.13±0.11     | -0.37                           | 0.146   | 0        | 66                           | -0.13±0.11     | No     |
| Herpetofauna                               | 24                            | -0.46±0.4      | 0.93                            | 0.111   | 0        | 24                           | -0.46±0.4      | No     |
| Fish                                       | 78                            | -0.56±0.32     | 0.36                            | 0.148   | 2        | 76                           | -0.51±0.29     | No     |
| Crustacean                                 | 39                            | 0.03±0.21      | -0.13                           | 0.576   | 1        | 38                           | -0.01±0.19     | No     |
| Echinoderm                                 | 3                             | NA             | NA                              | NA      | NA       | NA                           | NA             | NA     |
| Insect                                     | 4                             | NA             | NA                              | NA      | NA       | NA                           | NA             | NA     |
| <b>Native prey (Fig. 1f)</b>               |                               |                |                                 |         |          |                              |                |        |
| Mammal                                     | 56                            | -0.18±0.12     | -0.33                           | 0.194   | 0        | 56                           | -0.18±0.12     | No     |
| Herpetofauna                               | 78                            | -0.32±0.26     | -0.2                            | 0.37    | 0        | 78                           | -0.32±0.26     | No     |
| Fish                                       | 38                            | -0.59±0.38     | 0.71                            | 0.03    | 1        | 37                           | -0.51±0.30     | No     |
| Crustacean                                 | 16                            | -0.43±0.92     | 0.39                            | 0.55    | 0        | 16                           | -0.43±0.92     | No     |
| Mollusc                                    | 15                            | -0.19±1.08     | -0.81                           | 0.395   | 2        | 13                           | -0.06±0.26     | No     |
| Insect                                     | 11                            | -0.16±0.37     | 0.41                            | 0.398   | 1        | 10                           | -0.12±0.37     | No     |

**Figure S1.** Global map of the location of the study sites (n = 47) included in the database and used in the meta-analysis. The histogram of the latitudinal distribution of these study sites is shown in the right plot.

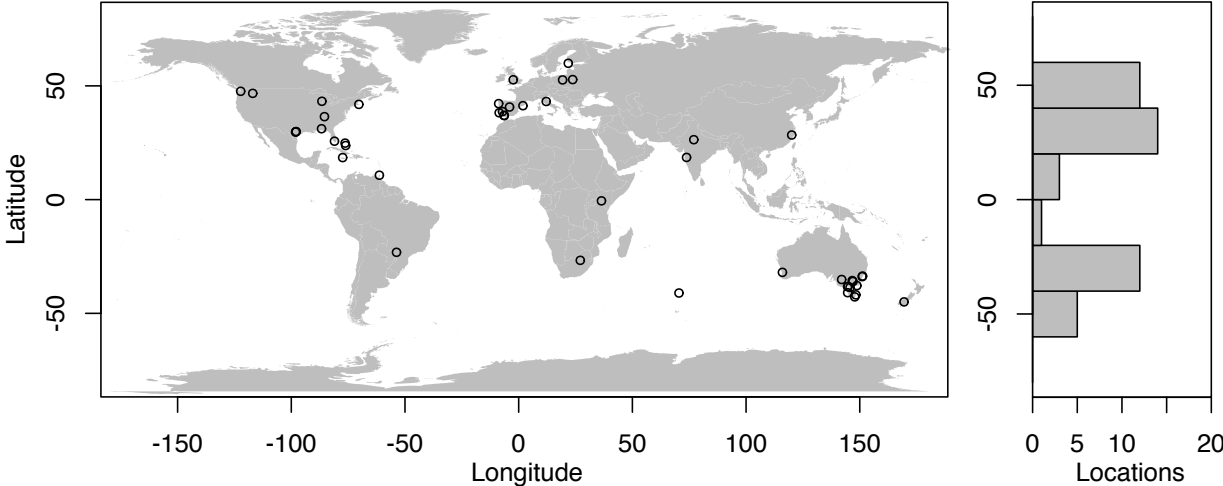

Supplement: rspb20192978supp1.pdf [file rspb20192978supp1.pdf]
